# Supplementary material for: Analysis of the potential for a malaria vaccine to reduce gaps in malaria intervention coverage
Source: bioRxiv or medRxiv preprint supplement (doi:10.1101/2020.10.09.20209973), 2020-10-13
Supplement: Supplementary file [file media-1.pdf]

## Supplementary Information: Analysis of the potential for a malaria vaccine to reduce gaps in malaria intervention coverage

**Table S1: Countries eligible for inclusion in the analysis and surveys from which data were extracted.** All surveys are available for download from the Demographic and Health Surveys website [1].

| Country                           | Surveys used       |
|-----------------------------------|--------------------|
| Angola (AO)                       | 2015 DHS           |
| Benin (BJ)                        | 2012 DHS           |
| Burkina Faso (BF)                 | 2010 DHS, 2014 MIS |
| Burundi (BU)                      | 2016 DHS           |
| Cameroon (CM)                     | 2011 DHS           |
| Cote d'Ivoire (CI)                | 2012 DHS           |
| Democratic Republic of Congo (CD) | 2013 DHS           |
| Ghana (GH)                        | 2014 DHS, 2016 MIS |
| Guinea (GN)                       | 2012 DHS           |
| Kenya (KE)                        | 2014 DHS, 2015 MIS |
| Liberia (LB)                      | 2013 DHS, 2016 MIS |
| Malawi (MW)                       | 2015 DHS, 2017 MIS |
| Mali (ML)                         | 2012 DHS, 2015 MIS |
| Mozambique (MZ)                   | 2015 AIS           |
| Nigeria (NG)                      | 2013 DHS, 2015 MIS |
| Sierra Leone (SL)                 | 2013 DHS, 2016 MIS |
| Tanzania (TZ)                     | 2015 DHS, 2017 MIS |
| Togo (TG)                         | 2013 DHS, 2017 MIS |
| Uganda (UG)                       | 2016 DHS           |
| Zambia (ZM)                       | 2013 DHS, 2015 MIS |

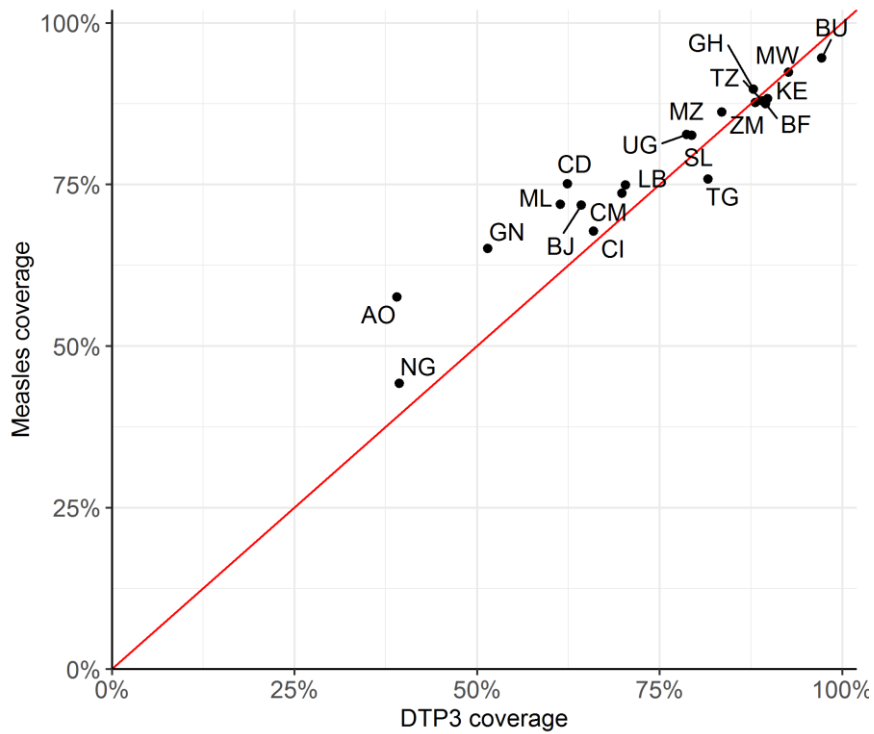

**Figure S1: Coverage of the DTP3 vaccine at the country level, compared to measles vaccine coverage.**

Spearman's correlation coefficient: 0.950. The red line represents correlation of 1.0. Countries shown: AO – Angola, BF – Burkina Faso, BJ – Benin, BU – Burundi, CD - Democratic Republic of Congo, CI – Cote d'Ivoire, CM – Cameroon, GH – Ghana, GN – Guinea, KE – Kenya, LB – Liberia, ML – Mali, MW – Malawi, MZ – Mozambique, NG – Nigeria, SL – Sierra Leone, TG – Togo, TZ – Tanzania, UG - Uganda and ZM – Zambia.

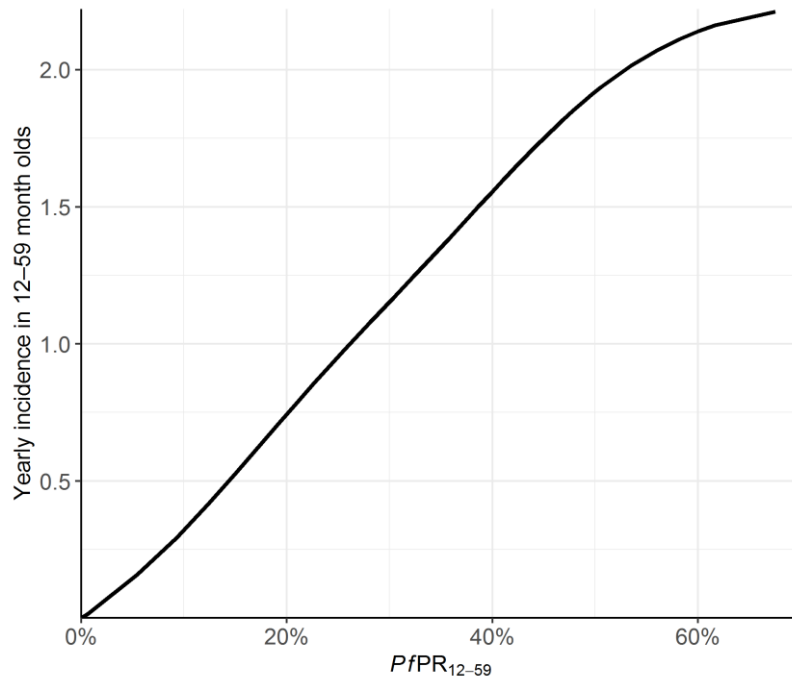

**Figure S2: Yearly clinical incidence of malaria as a function of the *P. falciparum* parasite prevalence in children aged 12–59 months (*PfPR*<sub>12–59</sub>).** Clinical incidence is the yearly number of events per child aged 12–59 months. This relationship was computed using a deterministic mathematical model for malaria transmission [2].

**Table S2: Numbers of children and proportions of multinomial regression predictors in each country.**

| Country code                 | Number of children (thousands) | Sex  |        | Age |     | Urban/ Rural |       | Mother's education |                      | Wealth Index |         |
|------------------------------|--------------------------------|------|--------|-----|-----|--------------|-------|--------------------|----------------------|--------------|---------|
|                              |                                | Male | Female | One | Two | Urban        | Rural | None & Primary     | Secondary & Tertiary | Bottom 60%   | Top 40% |
| Angola                       | 5451                           | 50%  | 50%    | 52% | 48% | 56%          | 44%   | 71%                | 29%                  | 78%          | 23%     |
| Burkina Faso                 | 4817                           | 51%  | 49%    | 52% | 48% | 37%          | 63%   | 89%                | 12%                  | 64%          | 36%     |
| Benin                        | 5461                           | 51%  | 49%    | 51% | 49% | 24%          | 76%   | 94%                | 6%                   | 61%          | 39%     |
| Burundi                      | 4979                           | 50%  | 50%    | 52% | 48% | 16%          | 84%   | 87%                | 13%                  | 60%          | 39%     |
| Democratic Republic of Congo | 2293                           | 49%  | 51%    | 53% | 47% | 42%          | 58%   | 65%                | 35%                  | 64%          | 36%     |
| Cote d'Ivoire                | 2814                           | 50%  | 50%    | 50% | 50% | 34%          | 66%   | 89%                | 10%                  | 70%          | 30%     |
| Cameroon                     | 6831                           | 50%  | 50%    | 50% | 50% | 30%          | 70%   | 65%                | 35%                  | 69%          | 31%     |
| Ghana                        | 2496                           | 52%  | 48%    | 52% | 48% | 31%          | 69%   | 89%                | 11%                  | 63%          | 37%     |
| Guinea                       | 2255                           | 52%  | 48%    | 50% | 50% | 41%          | 59%   | 54%                | 46%                  | 71%          | 28%     |
| Kenya                        | 8055                           | 51%  | 49%    | 50% | 50% | 32%          | 68%   | 73%                | 27%                  | 71%          | 29%     |
| Liberia                      | 2699                           | 52%  | 48%    | 53% | 47% | 32%          | 68%   | 79%                | 20%                  | 83%          | 17%     |
| Mali                         | 6492                           | 49%  | 51%    | 50% | 50% | 16%          | 84%   | 79%                | 22%                  | 65%          | 36%     |
| Malawi                       | 3608                           | 50%  | 50%    | 51% | 49% | 26%          | 74%   | 90%                | 10%                  | 58%          | 41%     |
| Mozambique                   | 1977                           | 48%  | 52%    | 51% | 49% | 36%          | 64%   | 79%                | 21%                  | 56%          | 44%     |
| Nigeria                      | 11154                          | 51%  | 49%    | 52% | 48% | 34%          | 66%   | 65%                | 35%                  | 64%          | 36%     |
| Sierra Leone                 | 4012                           | 49%  | 51%    | 51% | 49% | 30%          | 70%   | 81%                | 19%                  | 64%          | 36%     |
| Togo                         | 4032                           | 50%  | 50%    | 53% | 47% | 24%          | 76%   | 81%                | 19%                  | 62%          | 37%     |
| Tanzania                     | 2676                           | 50%  | 50%    | 52% | 48% | 30%          | 70%   | 78%                | 22%                  | 68%          | 32%     |
| Uganda                       | 5814                           | 51%  | 49%    | 50% | 50% | 19%          | 81%   | 75%                | 25%                  | 66%          | 33%     |
| Zambia                       | 5092                           | 50%  | 50%    | 51% | 49% | 37%          | 63%   | 66%                | 34%                  | 71%          | 29%     |

## References

1. ICF. Data. The DHS Program website. Funded by USAID. <https://dhsprogram.com/Data/>. Accessed 23 Mar 2020.
2. Griffin JT, Ferguson NM, Ghani AC. Estimates of the changing age-burden of *Plasmodium falciparum* malaria disease in sub-Saharan Africa. *Nat Commun.* 2014;5:3136. doi:10.1038/ncomms4136.
